# Supplementary material
Source: PubMed Central journal article supplement (PMC3595403)
Supplement: NIHMS435292-supplement-1.pdf [file NIHMS435292-supplement-1.pdf]

# SUPPLEMENTAL MATERIAL

## Appendix

### Comparison of Ischemic Stroke Outcomes and, Patient and Hospital Characteristics by Race/Ethnicity and Socioeconomic Status

**Table A1. Comparison Included and Excluded Observations**  
(N=155,539 discharges for Acute Ischemic Stroke in all non-federal hospitals in AZ, CA, FL, MA, NJ, NY, PA and TX, 2007)

|                          | Included | Excluded |
|--------------------------|----------|----------|
| # admissions             | 147,780  | 7759     |
| Female%                  | 53.7     | 42.8     |
| Age (%)                  |          |          |
| 18-64                    | 29.4     | 41.2     |
| 65-74                    | 20.7     | 20.5     |
| 75-84                    | 29.8     | 23.9     |
| 85+                      | 20.2     | 14.4     |
| Race/ethnicity (%)       |          |          |
| Whites                   | 66.7     | 62.9     |
| Blacks                   | 13.9     | 17.4     |
| Hispanics                | 11.5     | 14.1     |
| Other                    | 8.0      | 5.6      |
| Comorbidity (%)          |          |          |
| Atrial fibrillation      | 23.2     | 18.1     |
| Hypertension             | 77.6     | 75.9     |
| Diabetes                 | 34.2     | 32.3     |
| Coronary Heart Disease   | 27.5     | 23.8     |
| Congestive Heart Failure | 13.7     | 12.3     |
| Charlson Score           |          |          |
| 0                        | 47.8     | 47.5     |
| 1                        | 14.6     | 13.8     |
| 2                        | 24.1     | 25.0     |
| 3+                       | 13.4     | 13.7     |
| Inpatient Mortality (%)  | 5.5      | 4.6      |
| LOS, Median              | 4        | 4        |

**Table A2. Inpatient Mortality Risk Factors: Regression Estimates**

|                                     | Model 1<br>Adjusted for Patient<br>Characteristics |           |      | Model 2<br>Adjusted for Patient &<br>Hospital Characteristics |           |      |
|-------------------------------------|----------------------------------------------------|-----------|------|---------------------------------------------------------------|-----------|------|
|                                     | Odds Ratio                                         | 95% CI    |      | Odds Ratio                                                    | 95% CI    |      |
|                                     |                                                    | Low       | High |                                                               | Low       | High |
| Age: 18-64                          | 1.0                                                | Reference |      | 1.0                                                           | Reference |      |
| 65-74                               | 1.26***                                            | 1.17      | 1.37 | 1.27***                                                       | 1.18      | 1.38 |
| 75-84                               | 1.54***                                            | 1.44      | 1.66 | 1.56***                                                       | 1.45      | 1.68 |
| 85+                                 | 2.18***                                            | 2.02      | 2.35 | 2.21***                                                       | 2.05      | 2.38 |
| Female                              | 1.02                                               | 0.97      | 1.07 | 1.03                                                          | 0.98      | 1.08 |
| Comorbidity                         |                                                    |           |      |                                                               |           |      |
| Diabetes                            | 0.97                                               | 0.93      | 1.03 | 0.97                                                          | 0.92      | 1.03 |
| Hypertension                        | 0.63***                                            | 0.6       | 0.66 | 0.63***                                                       | 0.6       | 0.66 |
| Congestive Heart Failure            | 1.80***                                            | 1.7       | 1.9  | 1.79***                                                       | 1.7       | 1.9  |
| Coronary Heart Disease              | 1.17***                                            | 1.11      | 1.23 | 1.17***                                                       | 1.11      | 1.23 |
| Atrial fibrillation                 | 1.81***                                            | 1.72      | 1.9  | 1.81***                                                       | 1.72      | 1.9  |
| Charlson Score                      |                                                    |           |      |                                                               |           |      |
| 0                                   | 1.0                                                | Reference |      | 1.0                                                           | Reference |      |
| 1                                   | 1.21***                                            | 1.13      | 1.31 | 1.22***                                                       | 1.13      | 1.31 |
| 2                                   | 1.48***                                            | 1.39      | 1.57 | 1.47***                                                       | 1.39      | 1.56 |
| 3+                                  | 2.15***                                            | 2.02      | 2.29 | 2.15***                                                       | 2.02      | 2.3  |
| State                               |                                                    |           |      |                                                               |           |      |
| Arizona                             | 0.43***                                            | 0.35      | 0.53 | 0.43***                                                       | 0.34      | 0.54 |
| California                          | 1.0                                                | Reference |      | 1.0                                                           | Reference |      |
| Florida                             | 0.66***                                            | 0.58      | 0.74 | 0.68***                                                       | 0.6       | 0.77 |
| Massachusetts                       | 1.07                                               | 0.91      | 1.26 | 1.07                                                          | 0.9       | 1.27 |
| New Jersey                          | 0.88                                               | 0.75      | 1.02 | 0.9                                                           | 0.77      | 1.05 |
| New York                            | 1.29***                                            | 1.15      | 1.44 | 1.24***                                                       | 1.1       | 1.4  |
| Pennsylvania                        | 0.75***                                            | 0.66      | 0.85 | 0.78***                                                       | 0.68      | 0.88 |
| Texas                               | 0.84**                                             | 0.75      | 0.94 | 0.85**                                                        | 0.76      | 0.96 |
| ICU Beds                            |                                                    |           |      |                                                               |           |      |
| <= 14                               |                                                    |           |      | 1.0                                                           | Reference |      |
| 15 to 36                            |                                                    |           |      | 0.93                                                          | 0.86      | 1.01 |
| >= 37                               |                                                    |           |      | 0.95                                                          | 0.85      | 1.06 |
| Nursing staff (#<br>patients/nurse) |                                                    |           |      |                                                               |           |      |
| <= 2                                |                                                    |           |      | 1.0                                                           | Reference |      |
| 2.01 to 3.00                        |                                                    |           |      | 0.96                                                          | 0.87      | 1.04 |
| 3.01 to 4.00                        |                                                    |           |      | 0.95                                                          | 0.85      | 1.06 |
| > 4.00                              |                                                    |           |      | 0.99                                                          | 0.86      | 1.13 |
| Ownership                           |                                                    |           |      |                                                               |           |      |
| Non Profit                          |                                                    |           |      | 1.0                                                           | Reference |      |
| For Profit                          |                                                    |           |      | 0.91                                                          | 0.82      | 1.02 |
| Government, non-Federal             |                                                    |           |      | 1.20**                                                        | 1.07      | 1.36 |
| Teaching hospital, %                |                                                    |           |      | 1.12                                                          | 0.99      | 1.26 |
| Safety Net hospital, %              |                                                    |           |      | 1.14**                                                        | 1.05      | 1.24 |
| Constant                            | 0.03***                                            | 0.03      | 0.04 | 0.03***                                                       | 0.03      | 0.03 |
| C-statistic                         | 0.74                                               |           |      | 0.74                                                          |           |      |

Note: \*, \*\* and \*\*\* denote  $p < 0.05$ ,  $p < 0.01$  and  $p < 0.001$  respectively

**Table A3. Risk Factors for Length of Stay > 4 days: Regression Estimates**

|                                  | Model 1<br>Adjust for Patient<br>Characteristics |        |      | Model 2<br>Adjust for Patient &<br>Hospital Characteristics |        |      |
|----------------------------------|--------------------------------------------------|--------|------|-------------------------------------------------------------|--------|------|
|                                  | Odds Ratio                                       | 95% CI |      | Odds Ratio                                                  | 95% CI |      |
|                                  |                                                  | Low    | High |                                                             | Low    | High |
| Age                              |                                                  |        |      |                                                             |        |      |
| 18-64                            | Reference                                        |        |      | Reference                                                   |        |      |
| 65-74                            | 0.95**                                           | 0.92   | 0.99 | 0.96**                                                      | 0.93   | 0.99 |
| 75-84                            | 1.07***                                          | 1.04   | 1.1  | 1.07***                                                     | 1.04   | 1.11 |
| 85+                              | 1.04*                                            | 1      | 1.07 | 1.04*                                                       | 1      | 1.08 |
| Female                           | 1.08***                                          | 1.05   | 1.1  | 1.08***                                                     | 1.05   | 1.1  |
| Comorbidity                      |                                                  |        |      |                                                             |        |      |
| Diabetes                         | 1.18***                                          | 1.16   | 1.21 | 1.18***                                                     | 1.16   | 1.21 |
| Hypertension                     | 0.95***                                          | 0.92   | 0.97 | 0.95***                                                     | 0.92   | 0.97 |
| Congestive Heart Failure         | 1.56***                                          | 1.5    | 1.61 | 1.56***                                                     | 1.5    | 1.61 |
| Coronary Heart Disease           | 0.99                                             | 0.96   | 1.01 | 0.98                                                        | 0.96   | 1.01 |
| Atrial fibrillation              | 1.71***                                          | 1.66   | 1.76 | 1.71***                                                     | 1.66   | 1.76 |
| Charlson Score                   |                                                  |        |      |                                                             |        |      |
| 0                                | Reference                                        |        |      | Reference                                                   |        |      |
| 1                                | 1.40***                                          | 1.35   | 1.45 | 1.40***                                                     | 1.35   | 1.45 |
| 2                                | 1.98***                                          | 1.93   | 2.04 | 1.98***                                                     | 1.93   | 2.03 |
| 3+                               | 2.66***                                          | 2.56   | 2.75 | 2.66***                                                     | 2.56   | 2.75 |
| State                            |                                                  |        |      |                                                             |        |      |
| Arizona                          | 0.93                                             | 0.78   | 1.1  | 0.93*                                                       | 0.87   | 0.98 |
| California                       | Reference                                        |        |      | Reference                                                   |        |      |
| Florida                          | 1.38***                                          | 1.24   | 1.53 | 1.39***                                                     | 1.34   | 1.44 |
| Massachusetts                    | 0.97                                             | 0.83   | 1.14 | 1.09**                                                      | 1.03   | 1.15 |
| New Jersey                       | 2.26***                                          | 1.95   | 2.62 | 2.14***                                                     | 2.04   | 2.24 |
| New York                         | 2.86***                                          | 2.56   | 3.18 | 2.66***                                                     | 2.55   | 2.76 |
| Pennsylvania                     | 1.47***                                          | 1.31   | 1.65 | 1.47***                                                     | 1.41   | 1.53 |
| Texas                            | 1.32***                                          | 1.19   | 1.46 | 1.41***                                                     | 1.36   | 1.46 |
| Ownership, %                     |                                                  |        |      |                                                             |        |      |
| Non Profit                       | Reference                                        |        |      | Reference                                                   |        |      |
| For Profit                       |                                                  |        |      | 1.17***                                                     | 1.07   | 1.29 |
| Government, non-Federal          |                                                  |        |      | 1.03                                                        | 0.92   | 1.16 |
| Bed size (# inpatient beds)      |                                                  |        |      |                                                             |        |      |
| <= 199                           | Reference                                        |        |      | Reference                                                   |        |      |
| 200 to 499                       |                                                  |        |      | 1.08                                                        | 0.99   | 1.18 |
| >= 500                           |                                                  |        |      | 1.26**                                                      | 1.07   | 1.48 |
| ICU Beds                         |                                                  |        |      |                                                             |        |      |
| <= 14                            | Reference                                        |        |      | Reference                                                   |        |      |
| 15 to 36                         |                                                  |        |      | 1.06                                                        | 0.97   | 1.16 |
| >= 37                            |                                                  |        |      | 1.15*                                                       | 1.01   | 1.31 |
| Nursing staff (# patients/nurse) |                                                  |        |      |                                                             |        |      |
| <= 2                             | Reference                                        |        |      | Reference                                                   |        |      |
| 2.01 to 3.00                     |                                                  |        |      | 1.07                                                        | 0.99   | 1.16 |
| 3.01 to 4.00                     |                                                  |        |      | 1.16**                                                      | 1.05   | 1.28 |

|                                     |         |      |      |           |      |      |
|-------------------------------------|---------|------|------|-----------|------|------|
| > 4.00                              |         |      |      | 1.22**    | 1.08 | 1.39 |
| Emergency department admissions/day |         |      |      |           |      |      |
| <= 80                               |         |      |      | Reference |      |      |
| 81 to 175                           |         |      |      | 1         | 0.92 | 1.09 |
| >= 176                              |         |      |      | 0.95      | 0.84 | 1.08 |
| Teaching hospital, %                |         |      |      | 1.1       | 0.97 | 1.26 |
| Safety Net hospital, %              |         |      |      | 1.01      | 0.94 | 1.1  |
| Constant                            | 0.33*** | 0.31 | 0.36 | 0.25***   | 0.21 | 0.3  |

Note: \*, \*\* and \*\*\* denote  $p < 0.05$ ,  $p < 0.01$  and  $p < 0.001$  respectively

**Table A4. Unadjusted and Adjusted Inpatient Mortality Rates by Race, Ethnicity and Socioeconomic Status**

| Population Cohort                          | Race/Ethnicity or SES Stratum | N      | Observed Inpatient Mortality, % | Relative Inpatient Mortality Rates |                    |      |                                      |                    |      |                                                   |                    |      |
|--------------------------------------------|-------------------------------|--------|---------------------------------|------------------------------------|--------------------|------|--------------------------------------|--------------------|------|---------------------------------------------------|--------------------|------|
|                                            |                               |        |                                 | Unadjusted                         |                    |      | Adjusted for Patient Characteristics |                    |      | Adjusted for Patient and Hospital Characteristics |                    |      |
|                                            |                               |        |                                 | Odds Ratio                         | 95% CI<br>Low High |      | Odds Ratio                           | 95% CI<br>Low High |      | Odds Ratio                                        | 95% CI<br>Low High |      |
| <b>Comparisons by Race &amp; Ethnicity</b> |                               |        |                                 |                                    |                    |      |                                      |                    |      |                                                   |                    |      |
| All                                        | White                         | 98,512 | 5.8                             | 1.00                               | Reference          |      | 1.00                                 | Reference          |      | 1.00                                              | Reference          |      |
|                                            | Black                         | 20,579 | 4.4                             | 0.75                               | 0.70               | 0.80 | 1.02                                 | 0.94               | 1.1  | 0.96                                              | 0.89               | 1.04 |
|                                            | Hisp                          | 16,927 | 4.5                             | 0.76                               | 0.70               | 0.82 | 0.98                                 | 0.91               | 1.07 | 0.97                                              | 0.89               | 1.06 |
| Low Income                                 | White                         | 19,297 | 6.0                             | 1.00                               | Reference          |      | 1.00                                 | Reference          |      | 1.00                                              | Reference          |      |
|                                            | Black                         | 10,455 | 4.8                             | 0.78                               | 0.70               | 0.87 | 1.04                                 | 0.92               | 1.18 | 1.03                                              | 0.90               | 1.17 |
|                                            | Hisp                          | 7,394  | 4.9                             | 0.80                               | 0.71               | 0.91 | 1.05                                 | 0.91               | 1.2  | 1.04                                              | 0.91               | 1.20 |
| Medium Income                              | White                         | 27,063 | 5.8                             | 1.00                               | Reference          |      | 1.00                                 | Reference          |      | 1.00                                              | Reference          |      |
|                                            | Black                         | 4,427  | 4.0                             | 0.67                               | 0.57               | 0.79 | 0.88                                 | 0.74               | 1.05 | 0.87                                              | 0.73               | 1.03 |
|                                            | Hisp                          | 4,142  | 3.8                             | 0.64                               | 0.54               | 0.76 | 0.8                                  | 0.67               | 0.96 | 0.80                                              | 0.67               | 0.96 |
| High Income                                | White                         | 52,152 | 5.8                             | 1.00                               | Reference          |      | 1.00                                 | Reference          |      | 1.00                                              | Reference          |      |
|                                            | Black                         | 5,697  | 4.2                             | 0.71                               | 0.62               | 0.81 | 0.95                                 | 0.82               | 1.1  | 0.93                                              | 0.81               | 1.08 |
|                                            | Hisp                          | 5,391  | 4.4                             | 0.76                               | 0.66               | 0.87 | 0.99                                 | 0.86               | 1.15 | 0.99                                              | 0.85               | 1.14 |
| <b>Comparisons by Socioeconomic Status</b> |                               |        |                                 |                                    |                    |      |                                      |                    |      |                                                   |                    |      |
| All                                        | Low Income                    | 40,233 | 5.5                             | 0.99                               | 0.93               | 1.04 | 1.08                                 | 1.02               | 1.15 | 1.06                                              | 1.00               | 1.13 |
|                                            | Med Income                    | 38,579 | 5.4                             | 0.97                               | 0.92               | 1.02 | 1.00                                 | 0.94               | 1.06 | 0.99                                              | 0.93               | 1.06 |
|                                            | High Income                   | 68,968 | 5.6                             | 1.00                               | Reference          |      | 1.00                                 | Reference          |      | 1.00                                              | Reference          |      |
| Whites                                     | Low Income                    | 19,297 | 6.0                             | 1.04                               | 0.97               | 1.11 | 1.07                                 | 0.99               | 1.16 | 1.05                                              | 0.97               | 1.14 |
|                                            | Med Income                    | 27,063 | 5.8                             | 1.01                               | 0.95               | 1.08 | 1.05                                 | 0.98               | 1.12 | 1.04                                              | 0.97               | 1.12 |
|                                            | High Income                   | 52,152 | 5.8                             | 1.00                               | Reference          |      | 1.00                                 | Reference          |      | 1.00                                              | Reference          |      |
| Blacks                                     | Low Income                    | 10,455 | 4.8                             | 1.15                               | 0.98               | 1.35 | 1.17                                 | 0.99               | 1.38 | 1.15                                              | 0.97               | 1.36 |
|                                            | Med Income                    | 4,427  | 4.0                             | 0.96                               | 0.79               | 1.17 | 0.97                                 | 0.79               | 1.19 | 0.96                                              | 0.78               | 1.18 |
|                                            | High Income                   | 5,697  | 4.2                             | 1.00                               | Reference          |      | 1.00                                 | Reference          |      | 1.00                                              | Reference          |      |
| Hispanics                                  | Low Income                    | 7,394  | 4.9                             | 1.10                               | 0.93               | 1.30 | 1.12                                 | 0.93               | 1.34 | 1.11                                              | 0.92               | 1.33 |
|                                            | Med Income                    | 4,142  | 3.8                             | 0.86                               | 0.70               | 1.06 | 0.85                                 | 0.69               | 1.05 | 0.84                                              | 0.68               | 1.04 |
|                                            | High Income                   | 5,391  | 4.4                             | 1.00                               | Reference          |      | 1.00                                 | Reference          |      | 1.00                                              | Reference          |      |

Notes: Adjusted mortality rates obtained by hierarchical logistic regression of inpatient mortality on patient factors (age, sex and comorbidities) and hospital characteristics (nursing staff, ICU beds, teaching status and safety net hospital indicator) – as in Table A2

above. In addition indicators of cohorts compared (race/ethnicity or SES) were included. Separate regression models were estimated for each population stratum examined. Indicator for state was included in all regressions.

**Table A5. Unadjusted and Adjusted Rate of Longer (>4 days) Length of Stay by Race/Ethnicity and Socioeconomic Status**

| Population Cohort                          | Race/Ethnicity or SES Stratum | N      | Observed Rate of Longer Stays, % | Relative Rates of Longer Stays |                    |      |                                      |                        |        |                                                   |           |      |
|--------------------------------------------|-------------------------------|--------|----------------------------------|--------------------------------|--------------------|------|--------------------------------------|------------------------|--------|---------------------------------------------------|-----------|------|
|                                            |                               |        |                                  | Unadjusted                     |                    |      | Adjusted for Patient Characteristics |                        |        | Adjusted for Patient and Hospital Characteristics |           |      |
|                                            |                               |        |                                  | Odds Ratio                     | 95% CI<br>Low High |      | Odds Ratio                           | Odds Ratio<br>Low High | 95% CI | Odds Ratio<br>Low High                            |           |      |
| <b>Comparisons by Race &amp; Ethnicity</b> |                               |        |                                  |                                |                    |      |                                      |                        |        |                                                   |           |      |
| All                                        | White                         | 98,512 | 46.6                             | 1.00                           | Reference          |      | 1.00                                 | Reference              |        | 1.00                                              | Reference |      |
|                                            | Black                         | 20,579 | 55.2                             | 1.41                           | 1.37               | 1.46 | 1.36                                 | 1.31                   | 1.41   | 1.35                                              | 1.30      | 1.40 |
|                                            | Hisp                          | 16,927 | 48.5                             | 1.08                           | 1.04               | 1.11 | 1.19                                 | 1.14                   | 1.24   | 1.18                                              | 1.13      | 1.23 |
| Low Income                                 | White                         | 19,297 | 48.1                             | 1.00                           | Reference          |      | 1.00                                 | Reference              |        | 1.00                                              | Reference |      |
|                                            | Black                         | 10,455 | 56.1                             | 1.38                           | 1.31               | 1.45 | 1.33                                 | 1.25                   | 1.42   | 1.32                                              | 1.24      | 1.40 |
|                                            | Hisp                          | 7,394  | 52.0                             | 1.17                           | 1.11               | 1.23 | 1.24                                 | 1.16                   | 1.33   | 1.23                                              | 1.14      | 1.32 |
| Medium Income                              | White                         | 27,063 | 46.2                             | 1.00                           | Reference          |      | 1.00                                 | Reference              |        | 1.00                                              | Reference |      |
|                                            | Black                         | 4,427  | 54.1                             | 1.37                           | 1.29               | 1.46 | 1.37                                 | 1.27                   | 1.47   | 1.35                                              | 1.25      | 1.45 |
|                                            | Hisp                          | 4,142  | 45.1                             | 0.96                           | 0.90               | 1.02 | 1.12                                 | 1.03                   | 1.21   | 1.11                                              | 1.03      | 1.20 |
| High Income                                | White                         | 52,152 | 46.2                             | 1.00                           | Reference          |      | 1.00                                 | Reference              |        | 1.00                                              | Reference |      |
|                                            | Black                         | 5,697  | 54.4                             | 1.39                           | 1.31               | 1.46 | 1.35                                 | 1.27                   | 1.44   | 1.34                                              | 1.26      | 1.43 |
|                                            | Hisp                          | 5,391  | 46.1                             | 1.00                           | 0.94               | 1.05 | 1.16                                 | 1.09                   | 1.24   | 1.16                                              | 1.08      | 1.24 |
| <b>Comparisons by Socioeconomic Status</b> |                               |        |                                  |                                |                    |      |                                      |                        |        |                                                   |           |      |
| All                                        | Low Income                    | 40,233 | 51.2                             | 1.18                           | 1.16               | 1.21 | 1.15                                 | 1.12                   | 1.19   | 1.15                                              | 1.11      | 1.19 |
|                                            | Med Income                    | 38,579 | 47.4                             | 1.02                           | 0.99               | 1.04 | 1.05                                 | 1.02                   | 1.08   | 1.05                                              | 1.02      | 1.09 |
|                                            | High Income                   | 68,968 | 47.0                             | 1.00                           | Reference          |      | 1.00                                 | Reference              |        | 1.00                                              | Reference |      |
| Whites                                     | Low Income                    | 19,297 | 48.1                             | 1.08                           | 1.04               | 1.11 | 1.07                                 | 1.03                   | 1.12   | 1.08                                              | 1.03      | 1.12 |
|                                            | Med Income                    | 27,063 | 46.2                             | 1.00                           | 0.97               | 1.03 | 1.02                                 | 0.98                   | 1.06   | 1.02                                              | 0.98      | 1.06 |
|                                            | High Income                   | 52,152 | 46.2                             | 1.00                           | Reference          |      | 1.00                                 | Reference              |        | 1.00                                              | Reference |      |
| Blacks                                     | Low Income                    | 10,455 | 56.1                             | 1.07                           | 1.00               | 1.14 | 1.05                                 | 0.97                   | 1.14   | 1.05                                              | 0.97      | 1.13 |
|                                            | Med Income                    | 4,427  | 54.1                             | 0.99                           | 0.91               | 1.07 | 1.00                                 | 0.91                   | 1.10   | 1.00                                              | 0.91      | 1.10 |
|                                            | High Income                   | 5,697  | 54.4                             | 1.00                           | Reference          |      | 1.00                                 | Reference              |        | 1.00                                              | Reference |      |
| Hispanics                                  | Low Income                    | 7,394  | 52.0                             | 1.27                           | 1.18               | 1.36 | 1.18                                 | 1.08                   | 1.29   | 1.16                                              | 1.06      | 1.27 |
|                                            | Med Income                    | 4,142  | 45.1                             | 0.96                           | 0.89               | 1.04 | 1.02                                 | 0.93                   | 1.12   | 1.01                                              | 0.92      | 1.11 |
|                                            | High Income                   | 5,391  | 46.1                             | 1.00                           | Reference          |      | 1.00                                 | Reference              |        | 1.00                                              | Reference |      |

Notes: Adjusted mortality rates obtained by hierarchical logistic regression of inpatient mortality on patient factors (age, sex and comorbidities) and hospital characteristics (nursing staff, ICU beds, teaching status and safety net hospital indicator) – as in Table A2

above. In addition indicators of cohorts compared (race/ethnicity or SES) were included. Separate regression models were estimated for each population stratum examined. Indicator for state was included in all regressions.



**Table A6. Unadjusted and Adjusted Inpatient Mortality Rates By State & Race/Ethnicity**

| State | Race & Ethnicity | N      | Observed Inpatient Mortality, % | Unadjusted |           |      | Adjusted for Patient Characteristics |            |      | Adjusted for Patient and Hospital Characteristics |            |      |
|-------|------------------|--------|---------------------------------|------------|-----------|------|--------------------------------------|------------|------|---------------------------------------------------|------------|------|
|       |                  |        |                                 | Odds Ratio | 95% CI    |      | Odds Ratio                           | Odds Ratio |      | 95% CI                                            | Odds Ratio |      |
|       |                  |        |                                 |            | Low       | High |                                      | Low        | High |                                                   | Low        | High |
| AZ    | White            | 4,605  | 2.6                             | 1.00       | Reference |      | 1.00                                 | Reference  |      | 1.00                                              | Reference  |      |
|       | Black            | 193    | 2.1                             | 0.78       | 0.29      | 2.15 | 0.85                                 | 0.30       | 2.39 | 0.79                                              | 0.27       | 2.34 |
|       | Hispanic         | 775    | 3.1                             | 1.18       | 0.76      | 1.85 | 1.36                                 | 0.85       | 2.20 | 1.35                                              | 0.84       | 2.16 |
| CA    | White            | 18,615 | 6.9                             | 1.00       | Reference |      | 1.00                                 | Reference  |      | 1.00                                              | Reference  |      |
|       | Black            | 3,234  | 4.4                             | 0.62       | 0.52      | 0.75 | 0.84                                 | 0.69       | 1.02 | 0.82                                              | 0.68       | 0.99 |
|       | Hispanic         | 5,965  | 4.8                             | 0.68       | 0.59      | 0.77 | 0.92                                 | 0.79       | 1.06 | 0.89                                              | 0.77       | 1.02 |
| FL    | White            | 17,184 | 4.3                             | 1.00       | Reference |      | 1.00                                 | Reference  |      | 1.00                                              | Reference  |      |
|       | Black            | 4,217  | 3.8                             | 0.88       | 0.74      | 1.05 | 1.11                                 | 0.91       | 1.34 | 1.07                                              | 0.88       | 1.29 |
|       | Hispanic         | 2,387  | 3.7                             | 0.87       | 0.69      | 1.08 | 0.98                                 | 0.76       | 1.25 | 1.02                                              | 0.81       | 1.29 |
| MA    | White            | 6,383  | 7.7                             | 1.00       | Reference |      | 1.00                                 | Reference  |      | 1.00                                              | Reference  |      |
|       | Black            | 471    | 5.5                             | 0.7        | 0.47      | 1.05 | 1.00                                 | 0.65       | 1.56 | 0.91                                              | 0.59       | 1.40 |
|       | Hispanic         | 307    | 3.3                             | 0.4        | 0.21      | 0.76 | 0.66                                 | 0.34       | 1.28 | 0.67                                              | 0.35       | 1.28 |
| NJ    | White            | 7,041  | 6.2                             | 1.00       | Reference |      | 1.00                                 | Reference  |      | 1.00                                              | Reference  |      |
|       | Black            | 1,882  | 3.6                             | 0.56       | 0.43      | 0.72 | 0.79                                 | 0.59       | 1.06 | 0.72                                              | 0.53       | 0.97 |
|       | Hispanic         | 831    | 3.6                             | 0.56       | 0.39      | 0.82 | 0.74                                 | 0.49       | 1.10 | 0.65                                              | 0.43       | 0.98 |
| NY    | White            | 16,265 | 7.8                             | 1.00       | Reference |      | 1.00                                 | Reference  |      | 1.00                                              | Reference  |      |
|       | Black            | 4,592  | 5.6                             | 0.7        | 0.61      | 0.8  | 0.95                                 | 0.80       | 1.11 | 0.98                                              | 0.84       | 1.14 |
|       | Hispanic         | 2,172  | 4.9                             | 0.6        | 0.49      | 0.74 | 0.80                                 | 0.64       | 1.01 | 0.8                                               | 0.64       | 0.99 |
| PA    | White            | 16,079 | 5.0                             | 1.00       | Reference |      | 1.00                                 | Reference  |      | 1.00                                              | Reference  |      |
|       | Black            | 2,523  | 3.8                             | 0.76       | 0.61      | 0.94 | 1.10                                 | 0.86       | 1.40 | 0.98                                              | 0.77       | 1.25 |
|       | Hispanic         | 387    | 4.4                             | 0.88       | 0.54      | 1.44 | 1.33                                 | 0.79       | 2.23 | 1.17                                              | 0.71       | 1.92 |
| TX    | White            | 12,340 | 4.9                             | 1.00       | Reference |      | 1.00                                 | Reference  |      | 1.00                                              | Reference  |      |
|       | Black            | 3,467  | 4.5                             | 0.92       | 0.77      | 1.10 | 1.09                                 | 0.90       | 1.32 | 1.1                                               | 0.91       | 1.33 |
|       | Hispanic         | 4,103  | 4.8                             | 0.98       | 0.83      | 1.16 | 1.25                                 | 1.03       | 1.50 | 1.25                                              | 1.04       | 1.50 |

Notes: 1) Adjusted mortality rates obtained by hierarchical logistic regression of inpatient mortality on patient factors (age, sex and comorbidities) and hospital characteristics (nursing staff, ICU beds, teaching status and safety net hospital indicator). Indicator for state was included in both regressions.

**Table A7. Unadjusted and Adjusted Inpatient Mortality Rates By State & Socioeconomic Status**

| State | Income | N      | Observed Inpatient Mortality, % | Unadjusted |           |      | Adjusted for Patient Characteristics |            |           | Adjusted for Patient and Hospital Characteristics |            |           |
|-------|--------|--------|---------------------------------|------------|-----------|------|--------------------------------------|------------|-----------|---------------------------------------------------|------------|-----------|
|       |        |        |                                 | Odds Ratio | 95% CI    |      | Odds Ratio                           | Odds Ratio |           | 95% CI                                            | Odds Ratio |           |
|       |        |        |                                 |            | Low       | High |                                      | Low        | High      |                                                   | Low        | High      |
| AZ    | Low    | 1,360  | 2.8                             | 1.11       | 0.75      | 1.64 | 1.25                                 | 1.07       | 1.46      | 1.00                                              | 0.65       | 1.55      |
|       | Medium | 1,487  | 3.2                             | 1.28       | 0.89      | 1.85 | 0.99                                 | 0.85       | 1.14      | 1.07                                              | 0.71       | 1.61      |
|       | High   | 3,040  | 2.5                             | 1.00       | Reference | 1.00 | Reference                            | 1.00       | Reference | 1.00                                              | Reference  | Reference |
| CA    | Low    | 8,492  | 5.8                             | 0.89       | 0.79      | 0.99 | 1.12                                 | 1.04       | 1.21      | 1.01                                              | 0.90       | 1.14      |
|       | Medium | 8,086  | 5.8                             | 0.89       | 0.80      | 1.00 | 1.09                                 | 1.02       | 1.17      | 0.98                                              | 0.87       | 1.10      |
|       | High   | 15,449 | 6.5                             | 1.00       | Reference | 1.00 | Reference                            | 1.00       | Reference | 1.00                                              | Reference  | Reference |
| FL    | Low    | 7,044  | 4.4                             | 1.10       | 0.95      | 1.28 | 1.19                                 | 1.1        | 1.28      | 1.10                                              | 0.94       | 1.29      |
|       | Medium | 6,882  | 4.1                             | 1.02       | 0.87      | 1.19 | 1.04                                 | 0.97       | 1.12      | 1.03                                              | 0.88       | 1.21      |
|       | High   | 10,721 | 4.0                             | 1.00       | Reference | 1.00 | Reference                            | 1.00       | Reference | 1.00                                              | Reference  | Reference |
| MA    | Low    | 2,053  | 7.2                             | 0.89       | 0.72      | 1.09 | 1.08                                 | 0.94       | 1.23      | 0.95                                              | 0.76       | 1.20      |
|       | Medium | 1,978  | 6.5                             | 0.79       | 0.64      | 0.98 | 1.04                                 | 0.92       | 1.18      | 0.80                                              | 0.63       | 1.00      |
|       | High   | 3,524  | 8.1                             | 1.00       | Reference | 1.00 | Reference                            | 1.00       | Reference | 1.00                                              | Reference  | Reference |
| NJ    | Low    | 3,126  | 4.8                             | 0.81       | 0.66      | 0.99 | 1.32                                 | 1.17       | 1.5       | 0.88                                              | 0.69       | 1.13      |
|       | Medium | 2,798  | 5.6                             | 0.94       | 0.77      | 1.15 | 1.02                                 | 0.91       | 1.14      | 1.01                                              | 0.81       | 1.26      |
|       | High   | 4,485  | 5.9                             | 1.00       | Reference | 1.00 | Reference                            | 1.00       | Reference | 1.00                                              | Reference  | Reference |
| NY    | Low    | 6,909  | 6.6                             | 0.87       | 0.78      | 0.98 | 1.08                                 | 1          | 1.17      | 0.94                                              | 0.83       | 1.07      |
|       | Medium | 6,623  | 7.1                             | 0.94       | 0.84      | 1.06 | 0.99                                 | 0.92       | 1.08      | 0.93                                              | 0.82       | 1.05      |
|       | High   | 12,809 | 7.5                             | 1.00       | Reference | 1.00 | Reference                            | 1.00       | Reference | 1.00                                              | Reference  | Reference |
| PA    | Low    | 5,518  | 5.2                             | 1.13       | 0.97      | 1.32 | 1.15                                 | 1.06       | 1.26      | 1.29                                              | 1.09       | 1.52      |
|       | Medium | 5,105  | 5.0                             | 1.09       | 0.93      | 1.28 | 1.08                                 | 0.99       | 1.18      | 1.18                                              | 1.00       | 1.39      |
|       | High   | 9,240  | 4.6                             | 1.00       | Reference | 1.00 | Reference                            | 1.00       | Reference | 1.00                                              | Reference  | Reference |
| TX    | Low    | 5,731  | 5.9                             | 1.43       | 1.23      | 1.65 | 1.21                                 | 1.12       | 1.32      | 1.42                                              | 1.21       | 1.66      |
|       | Medium | 5,620  | 5.0                             | 1.19       | 1.02      | 1.39 | 1.09                                 | 1.01       | 1.18      | 1.13                                              | 0.97       | 1.33      |
|       | High   | 9,700  | 4.2                             | 1.00       | Reference | 1.00 | Reference                            | 1.00       | Reference | 1.00                                              | Reference  | Reference |

Note: 1) Adjusted mortality rates obtained by logistic regression of inpatient mortality on patient factors (age, sex and comorbidities) and hospital characteristics (bed size, ICU beds, nursing staff, average daily ED volume, teaching status and safety net hospital indicator). Indicator for state was included in both regressions.

**Table A8. Inpatient Mortality Risk Factors: Adding Use of Mechanical Ventilation**

|                                      | Model 1         |              |             | Model 2         |              |              |
|--------------------------------------|-----------------|--------------|-------------|-----------------|--------------|--------------|
|                                      | Odds Ratio      | 95% CI       |             | Odds Ratio      | 95% CI       |              |
|                                      |                 | Low          | High        |                 | Low          | High         |
| Age                                  |                 |              |             |                 |              |              |
| 18-64                                | 1.0             | Reference    |             | 1.0             | Reference    |              |
| 65-74                                | 1.38***         | 1.27         | 1.51        | 1.38***         | 1.26         | 1.51         |
| 75-84                                | 1.97***         | 1.82         | 2.13        | 1.96***         | 1.81         | 2.12         |
| 85+                                  | 3.40***         | 3.13         | 3.69        | 3.38***         | 3.11         | 3.67         |
| Female                               | 1.09**          | 1.03         | 1.15        | 1.09**          | 1.03         | 1.15         |
| <b>Use of mechanical ventilation</b> | <b>28.92***</b> | <b>27.07</b> | <b>30.9</b> | <b>29.18***</b> | <b>27.31</b> | <b>31.18</b> |
| Comorbidity                          |                 |              |             |                 |              |              |
| Diabetes                             | 0.97            | 0.92         | 1.03        | 0.97            | 0.92         | 1.03         |
| Hypertension                         | 0.70***         | 0.66         | 0.74        | 0.70***         | 0.66         | 0.74         |
| Congestive Heart Failure             | 1.55***         | 1.46         | 1.65        | 1.55***         | 1.46         | 1.65         |
| Coronary Heart Disease               | 1.23***         | 1.16         | 1.3         | 1.23***         | 1.16         | 1.3          |
| Atrial fibrillation                  | 1.62***         | 1.54         | 1.72        | 1.63***         | 1.54         | 1.72         |
| Charlson Score                       |                 |              |             |                 |              |              |
| 0                                    | 1.0             | Reference    |             | 1.0             | Reference    |              |
| 1                                    | 1.15***         | 1.06         | 1.25        | 1.15***         | 1.06         | 1.24         |
| 2                                    | 1.35***         | 1.27         | 1.44        | 1.35***         | 1.27         | 1.44         |
| 3+                                   | 1.94***         | 1.81         | 2.08        | 1.95***         | 1.81         | 2.09         |
| State                                |                 |              |             |                 |              |              |
| Arizona                              | 0.41***         | 0.32         | 0.53        | 0.43***         | 0.33         | 0.55         |
| California                           | 1.0             | Reference    |             | 1.0             | Reference    |              |
| Florida                              | 0.62***         | 0.55         | 0.71        | 0.66***         | 0.57         | 0.75         |
| Massachusetts                        | 1.1             | 0.92         | 1.32        | 1.14            | 0.94         | 1.38         |
| New Jersey                           | 0.83*           | 0.7          | 0.99        | 0.88            | 0.74         | 1.04         |
| New York                             | 1.17*           | 1.03         | 1.32        | 1.15*           | 1.01         | 1.31         |
| Pennsylvania                         | 0.82**          | 0.72         | 0.95        | 0.85*           | 0.74         | 0.98         |
| Texas                                | 0.89            | 0.78         | 1.01        | 0.93            | 0.81         | 1.05         |
| ICU Beds                             |                 |              |             |                 |              |              |
| <= 14                                |                 |              |             | 1.0             | Reference    |              |
| 15 to 36                             |                 |              |             | 0.86**          | 0.78         | 0.94         |
| >= 37                                |                 |              |             | 0.83**          | 0.73         | 0.94         |
| Nursing staff (# patients/nurse)     |                 |              |             |                 |              |              |
| <= 2                                 |                 |              |             | 1.0             | Reference    |              |
| 2.01 to 3.00                         |                 |              |             | 0.97            | 0.88         | 1.07         |
| 3.01 to 4.00                         |                 |              |             | 0.96            | 0.85         | 1.08         |
| > 4.00                               |                 |              |             | 1.05            | 0.9          | 1.22         |
| Ownership                            |                 |              |             |                 |              |              |
| Non Profit                           |                 |              |             | 1.0             | Reference    |              |
| For Profit                           |                 |              |             | 0.88*           | 0.78         | 1            |
| Government, non-Federal              |                 |              |             | 1.20**          | 1.05         | 1.38         |
| Teaching hospital, %                 |                 |              |             | 0.9             | 0.78         | 1.02         |
| Safety Net hospital, %               |                 |              |             | 1.03            | 0.94         | 1.13         |
| Constant                             | 0.02***         | 0.01         | 0.02        | 0.02***         | 0.02         | 0.02         |
| C-statistic                          | 0.85            |              |             | 0.85            |              |              |

Note: \*, \*\* and \*\*\* denote p<0.05, p<0.01 and p<0.001 respectively

**Table A9. Unadjusted and Adjusted Inpatient Mortality Rates by Race, Ethnicity and Socioeconomic Status:  
Adding Use of Mechanical Ventilation**

| Population Cohort                          | Race/Ethnicity or SES Stratum | N      | Observed Inpatient Mortality, % | Relative Inpatient Mortality Rates |               |          |                                      |               |          |                                                   |               |          |
|--------------------------------------------|-------------------------------|--------|---------------------------------|------------------------------------|---------------|----------|--------------------------------------|---------------|----------|---------------------------------------------------|---------------|----------|
|                                            |                               |        |                                 | Unadjusted                         |               |          | Adjusted for Patient Characteristics |               |          | Adjusted for Patient and Hospital Characteristics |               |          |
|                                            |                               |        |                                 | Odds Ratio                         | 95% Conf. Int | Low High | Odds Ratio                           | 95% Conf. Int | Low High | Odds Ratio                                        | 95% Conf. Int | Low High |
| <b>Comparisons by Race &amp; Ethnicity</b> |                               |        |                                 |                                    |               |          |                                      |               |          |                                                   |               |          |
| All                                        | White                         | 98,512 | 5.8                             | 1.00                               | Reference     |          | 1.00                                 | Reference     |          | 1.00                                              | Reference     |          |
|                                            | Black                         | 20,579 | 4.4                             | 0.75                               | 0.70          | 0.80     | 0.83                                 | 0.76          | 0.91     | 0.84                                              | 0.77          | 0.92     |
|                                            | Hisp                          | 16,927 | 4.5                             | 0.76                               | 0.70          | 0.82     | 0.90                                 | 0.82          | 0.99     | 0.91                                              | 0.82          | 1.00     |
| Low Income                                 | White                         | 19,297 | 6.0                             | 1.00                               | Reference     |          | 1.00                                 | Reference     |          | 1.00                                              | Reference     |          |
|                                            | Black                         | 10,455 | 4.8                             | 0.78                               | 0.70          | 0.87     | 0.83                                 | 0.72          | 0.96     | 0.86                                              | 0.75          | 1.00     |
|                                            | Hisp                          | 7,394  | 4.9                             | 0.80                               | 0.71          | 0.91     | 0.91                                 | 0.78          | 1.06     | 0.95                                              | 0.81          | 1.12     |
| Medium Income                              | White                         | 27,063 | 5.8                             | 1.00                               | Reference     |          | 1.00                                 | Reference     |          | 1.00                                              | Reference     |          |
|                                            | Black                         | 4,427  | 4.0                             | 0.67                               | 0.57          | 0.79     | 0.73                                 | 0.6           | 0.88     | 0.74                                              | 0.61          | 0.89     |
|                                            | Hisp                          | 4,142  | 3.8                             | 0.64                               | 0.54          | 0.76     | 0.72                                 | 0.59          | 0.89     | 0.73                                              | 0.6           | 0.89     |
| High Income                                | White                         | 52,152 | 5.8                             | 1.00                               | Reference     |          | 1.00                                 | Reference     |          | 1.00                                              | Reference     |          |
|                                            | Black                         | 5,697  | 4.2                             | 0.71                               | 0.62          | 0.81     | 0.83                                 | 0.71          | 0.98     | 0.83                                              | 0.71          | 0.98     |
|                                            | Hisp                          | 5,391  | 4.4                             | 0.76                               | 0.66          | 0.87     | 0.93                                 | 0.79          | 1.09     | 0.93                                              | 0.8           | 1.09     |
| <b>Comparisons by Socioeconomic Status</b> |                               |        |                                 |                                    |               |          |                                      |               |          |                                                   |               |          |
| All                                        | Low Income                    | 40,233 | 5.5                             | 0.99                               | 0.93          | 1.04     | 1.04                                 | 0.97          | 1.12     | 1.04                                              | 0.97          | 1.11     |
|                                            | Med Income                    | 38,579 | 5.4                             | 0.97                               | 0.92          | 1.02     | 1.00                                 | 0.93          | 1.07     | 0.99                                              | 0.92          | 1.06     |
|                                            | High Income                   | 68,968 | 5.6                             | 1.00                               | Reference     |          | 1.00                                 | Reference     |          | 1.00                                              | Reference     |          |
| Whites                                     | Low Income                    | 19,297 | 6.0                             | 1.04                               | 0.97          | 1.11     | 1.07                                 | 0.98          | 1.17     | 1.05                                              | 0.96          | 1.15     |
|                                            | Med Income                    | 27,063 | 5.8                             | 1.01                               | 0.95          | 1.08     | 1.07                                 | 0.99          | 1.15     | 1.05                                              | 0.98          | 1.14     |
|                                            | High Income                   | 52,152 | 5.8                             | 1.00                               | Reference     |          | 1.00                                 | Reference     |          | 1.00                                              | Reference     |          |
| Blacks                                     | Low Income                    | 10,455 | 4.8                             | 1.15                               | 0.98          | 1.35     | 1.09                                 | 0.9           | 1.32     | 1.11                                              | 0.92          | 1.36     |
|                                            | Med Income                    | 4,427  | 4.0                             | 0.96                               | 0.79          | 1.17     | 0.91                                 | 0.72          | 1.15     | 0.91                                              | 0.72          | 1.16     |
|                                            | High Income                   | 5,697  | 4.2                             | 1.00                               | Reference     |          | 1.00                                 | Reference     |          | 1.00                                              | Reference     |          |
| Hispanics                                  | Low Income                    | 7,394  | 4.9                             | 1.10                               | 0.93          | 1.30     | 1.08                                 | 0.88          | 1.33     | 1.13                                              | 0.92          | 1.39     |
|                                            | Med Income                    | 4,142  | 3.8                             | 0.86                               | 0.70          | 1.06     | 0.83                                 | 0.66          | 1.06     | 0.84                                              | 0.66          | 1.06     |
|                                            | High Income                   | 5,391  | 4.4                             | 1.00                               | Reference     |          | 1.00                                 | Reference     |          | 1.00                                              | Reference     |          |

Notes: Adjusted mortality rates obtained by hierarchical logistic regression of inpatient mortality on patient factors (age, sex and comorbidities) and hospital characteristics (nursing staff, ICU beds, teaching status and safety net hospital indicator). In addition indicators of cohorts compared (race/ethnicity or SES) were included. Separate regression models were estimated for each population stratum examined. Indicator for state was included in all regressions.
